# Supplementary material for: Mesoporous NiO with a single-crystalline structure utilized as a noble metal-free catalyst for non-aqueous Li–O2 batteries
Source: Royal Society of Chemistry journal article supplement (doi:10.1039/c5ta03685b), 2015-01-01
Supplement: c5ta03685b1.pdf [file c5ta03685b1.pdf]

## Supplementary Information:

### Mesoporous NiO single-crystalline utilized as noble metal free catalyst for non-aqueous Li-O<sub>2</sub> battery

Shengfu Tong,<sup>a,‡</sup> Mingbo Zheng,<sup>b,‡</sup> Yong Lu,<sup>a</sup> Zixia Lin,<sup>b</sup> Jun Li,<sup>b</sup> Xueping Zhang,<sup>a</sup> Yi Shi,<sup>b</sup> Ping He<sup>a,\*</sup> and Haoshen Zhou<sup>a,c</sup>

- a. National Laboratory of Solid State Microstructures, College of Engineering and Applied Sciences, Collaborative Innovation Center of Advanced Microstructures, Nanjing 210093, China.
- b. School of Electronic Science and Engineering, Nanjing University, Nanjing 210093, China.
- c. Energy Technology Research Institute, National Institute of Advanced Industrial Science and Technology (AIST), Umezono 1-1-1, Tsukuba 305-8568, Japan.

\*Corresponding author: Prof. P. He

E-mail: [pinghe@nju.edu.cn](mailto:pinghe@nju.edu.cn)

‡ These authors contributed equally to this work.

## Results

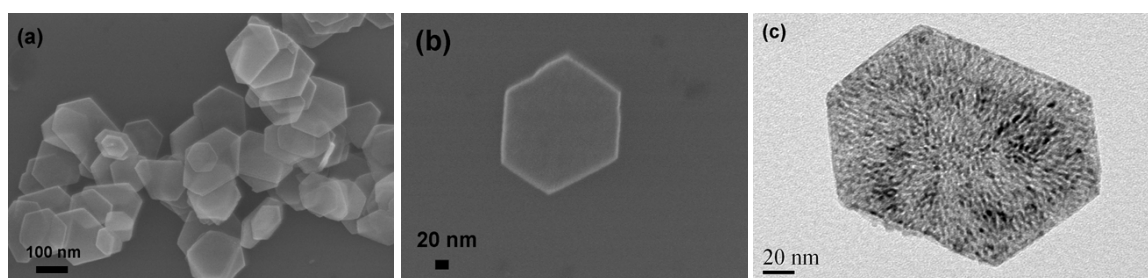

**Fig. S1** SEM (a and b) and TEM (c) images of as-prepared NiO.

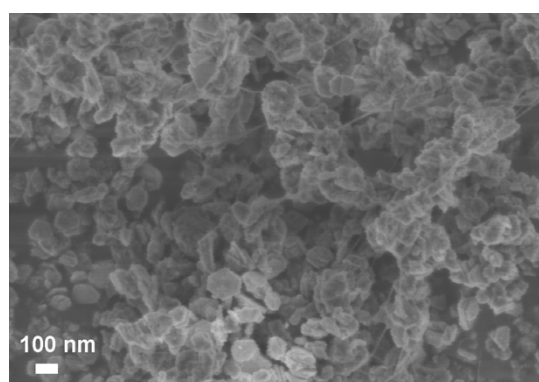

**Fig. S2** SEM image of NiO/AB based electrode experienced discharge and recharge.

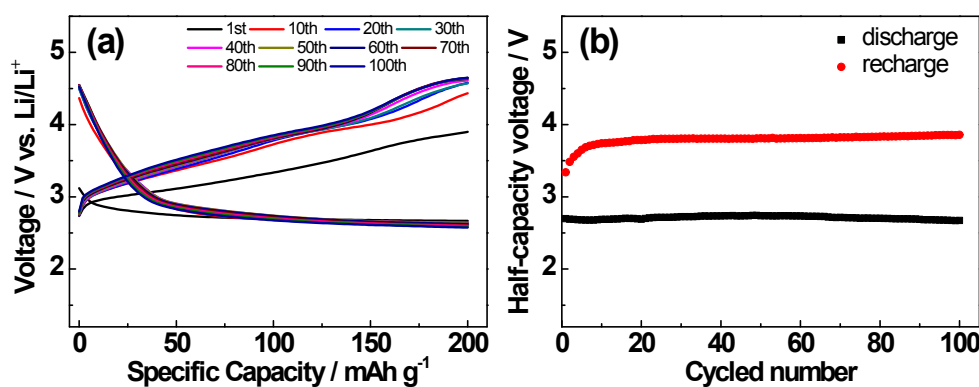

**Fig. S3** (a) The continuously cycled discharge-charge curves with cut-off capacity of 200 mAh·g<sup>-1</sup> of the non-aqueous Li-O<sub>2</sub> battery with NiO as the oxygen cathodic material, the current applied for discharge and charge was 100 mA·g<sup>-1</sup>; (b) the relation between the half-capacity voltage and the cycled times during the continuously cycled discharge-recharge performances.
